# Supplementary material for: SS-31 treatment ameliorates cardiac mitochondrial morphology and defective mitophagy in a murine model of Barth syndrome
Source: PubMed Central journal article supplement (PMC11176169; doi:10.1038/s41598-024-64368-y), 2024-06-13
Supplement: 41598_2024_64368_MOESM1_ESM.pdf [file 41598_2024_64368_MOESM1_ESM.pdf]

## SUPPLEMENTARY MATERIAL

### **SS-31 TREATMENT AMELIORATES CARDIAC MITOCHONDRIAL MORPHOLOGY AND DEFECTIVE MITOPHAGY IN A MURINE MODEL OF BARTH SYNDROME**

*Silvia Russo<sup>1#</sup>, Domenico De Rasmò<sup>2#</sup>, Roberta Rossi<sup>3</sup>, Anna Signorile<sup>1\*</sup> & Simona Lobasso<sup>1\*</sup>*

<sup>1</sup>Department of Translational Biomedicine and Neuroscience (DiBraIn), University of Bari Aldo Moro, Bari, Italy;

<sup>2</sup>CNR-Institute of Biomembranes, Bioenergetics and Molecular Biotechnologies, Bari, Italy; <sup>3</sup>Department of Precision and Regenerative Medicine and Ionian Area (DiMePREJ), University of Bari Aldo Moro, Bari, Italy

**Legend Supplementary Figures 1-3.**

Stain free images of full-length gels are shown on the right of each blot. The images show the total proteins used for normalization of each lane. Precision Plus Protein™ All Blue Prestained Protein Standards #1610373 in the range of 10–250 kDa were used to identify protein molecular weights.

Each PVDF membrane was cut into sections with a razor blade, before blotting. Each section was incubated with a different primary antibody, as several of the selected primary antibodies belong to the same species. All blots were exposed separately with a BioRad ChemiDoc Touch Imaging (*Bio-Rad*) to avoid signal saturation. The optimal exposure image selected for each protein is shown. Cropped areas showed in the figures of the manuscript are marked by red lines.

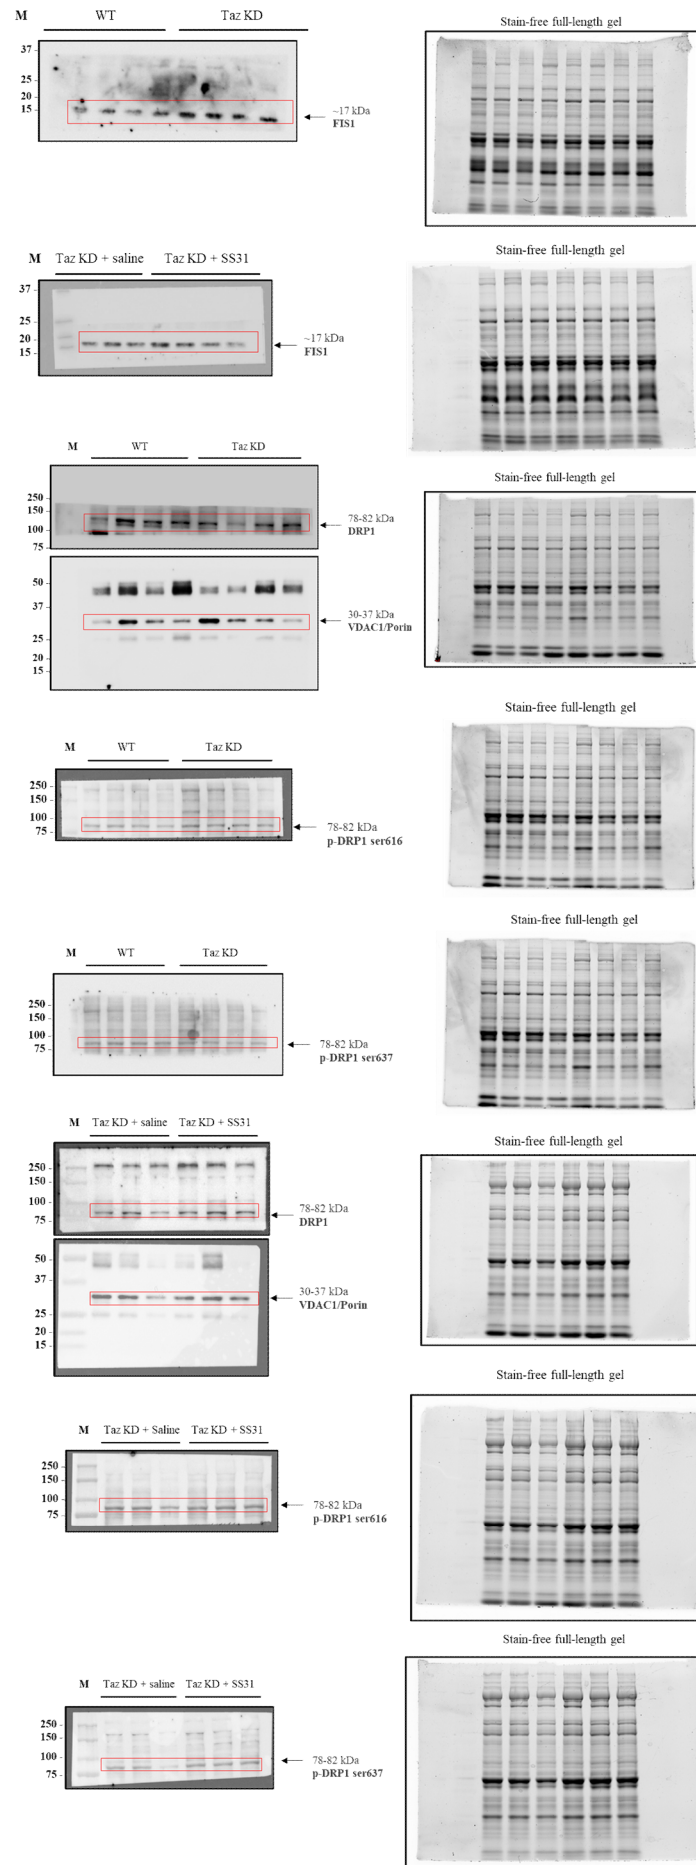

Figure S1

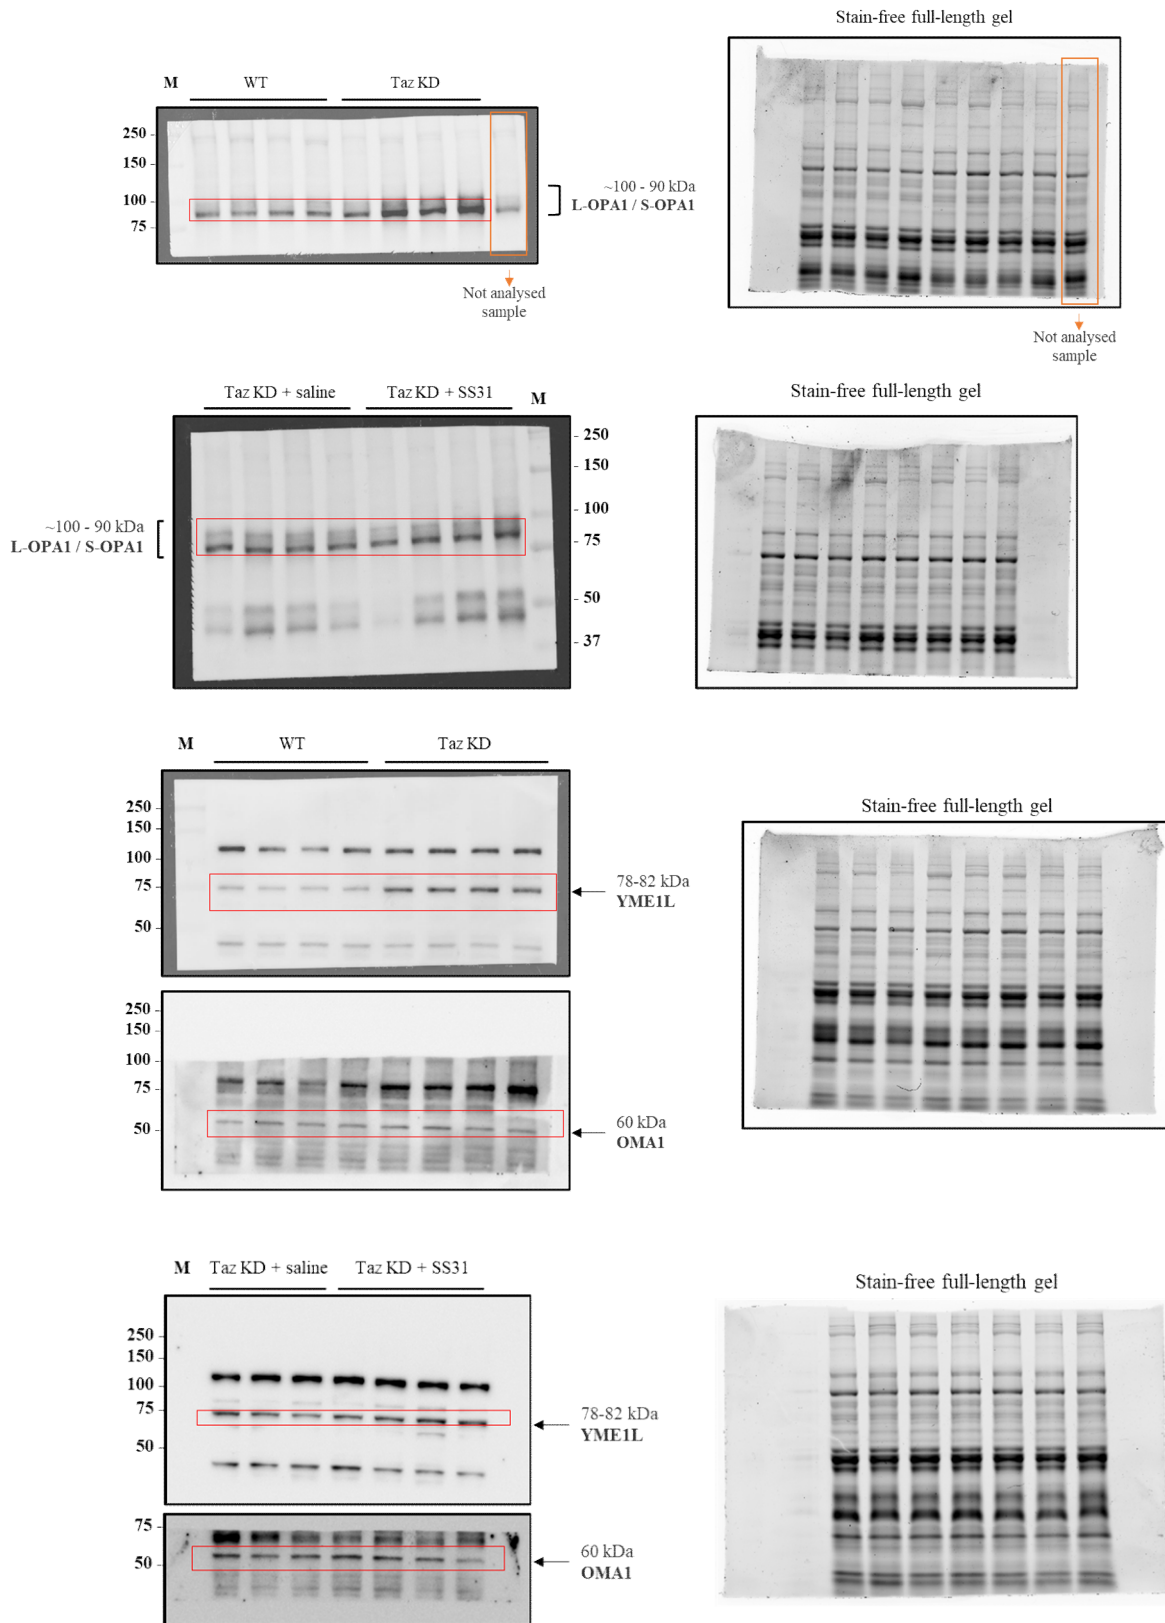

Figure S2

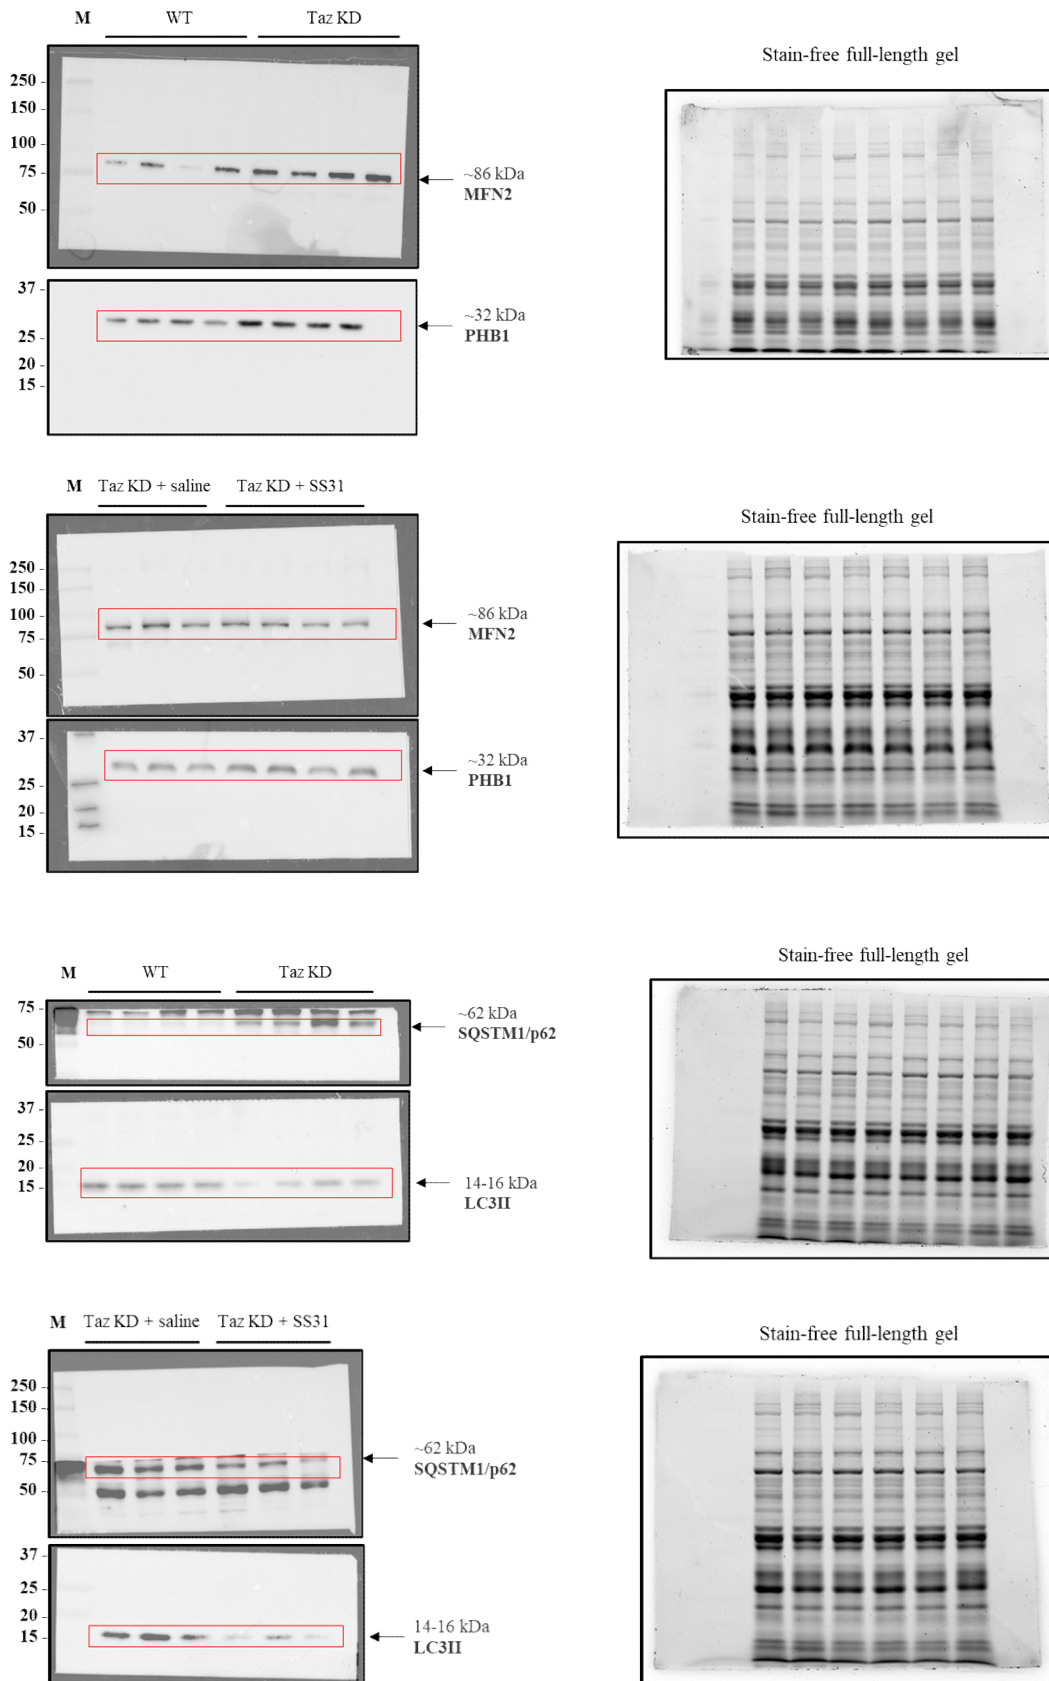

Figure S3

**Supplementary Table 1:  
List of antibodies used for immunoblotting analysis.**

| Antibody        | Host animal        | Dilution | Distributor, Cat. Num.                   |
|-----------------|--------------------|----------|------------------------------------------|
| Anti-FIS1       | Rabbit, polyclonal | 1:1,000  | Merck Millipore, ABC67                   |
| Anti-DRP1       | Rabbit, polyclonal | 1:200    | Santa Cruz Biotechnology, Inc, sc-32898  |
| p-DRP1 ser(616) | Rabbit, polyclonal | 1:500    | Cell Signaling Technology, Inc, 3455     |
| p-DRP1 ser(637) | Rabbit, polyclonal | 1:500    | Cell Signaling Technology, Inc, 4867     |
| VDAC1/Porin     | Mouse, monoclonal  | 1:1,000  | Molecular Probes, A31855                 |
| OPA1            | Mouse, monoclonal  | 1:2,000  | Thermo Fisher Scientific, Inc, MA5-16149 |
| YME1L           | Rabbit, polyclonal | 1:2,000  | Abcam, ab170123                          |
| OMA1            | Rabbit, polyclonal | 1:500    | Abcam, ab154949                          |
| MFN2            | Rabbit, monoclonal | 1:2,000  | Cell Signaling Technology, Inc, 11925    |
| PHB1            | Rabbit, polyclonal | 1:1,000  | Cell Signaling Technology, Inc, 2426     |
| SQSTM1/p62      | Rabbit, polyclonal | 1:1,000  | MBL International, PM045                 |
| LC3             | Rabbit, polyclonal | 1:1,000  | Cell Signaling Technology, Inc, 2775     |
